# Supplementary material for: Starch Chemical Composition and Molecular Structure in Relation to Physicochemical Characteristics and Resistant Starch Content of Four Thai Commercial Rice Cultivars Differing in Pasting Properties
Source: MDPI journal article supplement (doi:10.3390/polym15030574), 2023-01-22
Supplement: s1 [file s1]

## Supplementary data

**Figure S1** Environmental temperature and relative humidity of the cultivation location of the tested rice cultivars.

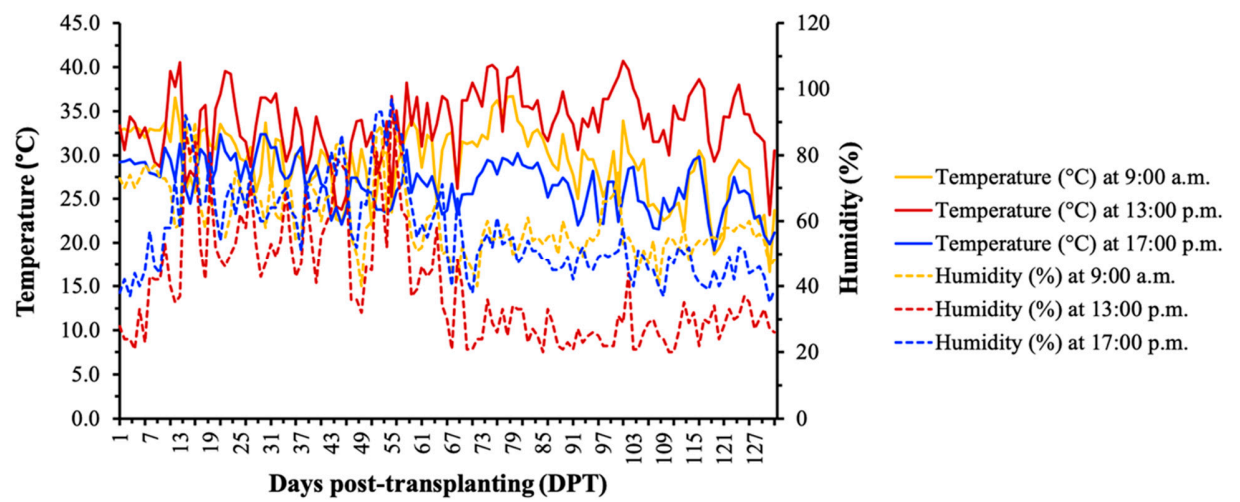

**Figure S2** DSC thermogram displaying endosperm starch gelatinization properties of 4 Thai commercial rice cultivars.

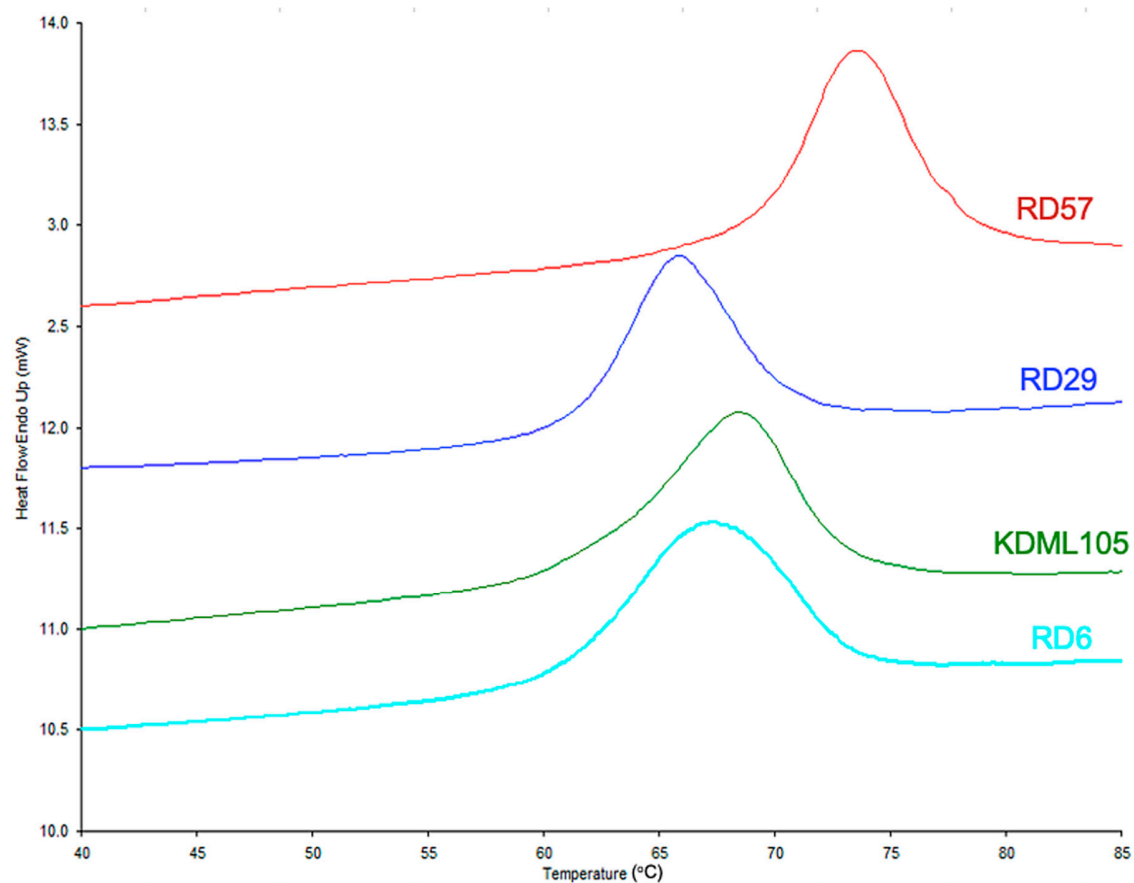

**Figure S3** DSC thermogram displaying endosperm starch retrogradation properties of 4 Thai commercial rice cultivars.

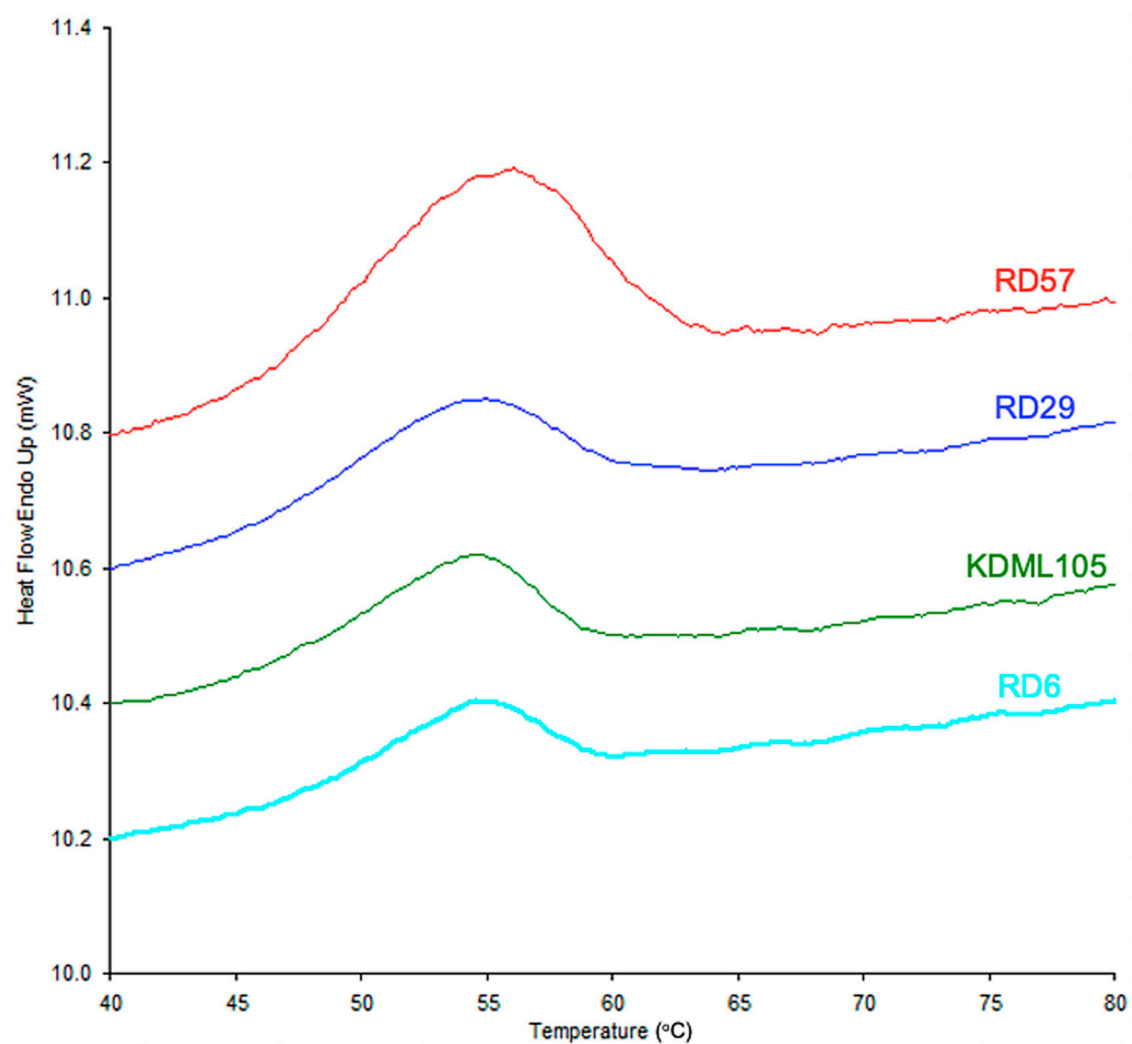

**Table S1** The values of RVA parameters, amylose content, photosensitivity, and growth duration of 4 different groups of Thai certified rice starches.

| Groups | Cultivars | RVA parameters            |                             |                              | Amylose content (%) | Photosensitivity | Growth duration (Days) |
|--------|-----------|---------------------------|-----------------------------|------------------------------|---------------------|------------------|------------------------|
|        |           | PT (°C)                   | PV (mPa.s)                  | SB (mPa.s)                   |                     |                  |                        |
| 1      | RD6       | 72.70±0.45 <sup>e</sup>   | 2269.33±81.06 <sup>b</sup>  | 270.67±8.98 <sup>f</sup>     | 2.08                | ✓                | 110-120                |
|        | KDML105   | 75.67±0.24 <sup>cde</sup> | 3064.33±114.62 <sup>a</sup> | 668.67±11.85 <sup>ef</sup>   | 14.38               | ✓                | 120                    |
|        | PTT1      | 76.47±0.33 <sup>cd</sup>  | 3447.67±74.38 <sup>a</sup>  | 675.67±52.41 <sup>e</sup>    | 14-18.42            |                  | 104-126                |
| 2      | RD21      | 75.97±0.02 <sup>cde</sup> | 3197.00±178.94 <sup>a</sup> | 950.67±37.24 <sup>de</sup>   | 17-20               |                  | 120-130                |
|        | PL80      | 73.50±0.48 <sup>de</sup>  | 3073.00±143.96 <sup>a</sup> | 1159±73.23 <sup>d</sup>      | 17.3                | ✓                | 120                    |
|        | RD43      | 75.57±0.73 <sup>cde</sup> | 3016.33±82.57 <sup>a</sup>  | 1183.67±56.00 <sup>d</sup>   | 16-18.82            |                  | 95                     |
| 3      | RD61      | 77.95±0.70 <sup>bc</sup>  | 1227.67±23.85 <sup>d</sup>  | 1214.00±3.79 <sup>d</sup>    | 26.82               |                  | 87                     |
|        | RD29      | 76.88±0.95 <sup>cd</sup>  | 1584.00±40.70 <sup>cd</sup> | 1690.33±40.93 <sup>bc</sup>  | 26.6-29.4           |                  | 103                    |
|        | RD37      | 83.98±0.81 <sup>a</sup>   | 2176.33±53.27 <sup>b</sup>  | 1336.67±160.06 <sup>cd</sup> | 21.6                |                  | 108-118                |
| 4      | RD41      | 81.45±1.28 <sup>ab</sup>  | 1642.33±53.27 <sup>cd</sup> | 1765.33±167.69 <sup>ab</sup> | 27.15-30            |                  | 105                    |
|        | RD57      | 82.37±0.78 <sup>a</sup>   | 1927.67±34.91 <sup>b</sup>  | 2115.33±68.13 <sup>a</sup>   | 27.33               |                  | 110-120                |

Values are means ± SEM. Means within pasting temperature (PT), peak viscosity (PV), and setback (SB) columns with different superscripts are significantly different ( $p \leq 0.05$ ), and the means in each column indicate statistically significant difference at  $p \leq 0.05$  by Tukey's test ( $n = 3$ ).
